# Supplementary material for: Climatic Effects on Position and Dynamics of Upper Open Forest Boundary in Altay and Western Sayan in the Last 60 Years
Source: MDPI journal article supplement (doi:10.3390/f14101987), 2023-10-03
Supplement: s1 [file s1]

**Table S1.** Altitudinal position and shift of OFB in 1960 and 2020.

| Peak                  | 1960        |             |             |      | 2020         |             |             |      | Shift 1960–2020 |             |             |
|-----------------------|-------------|-------------|-------------|------|--------------|-------------|-------------|------|-----------------|-------------|-------------|
|                       | S           | N           | Gen         | S/N  | S            | N           | Gen         | S/N  | S               | N           | Gen         |
| Tigereksky            | 1230        | 1416        | 1307        | 0.87 | 1384         | 1520        | 1452        | 0.91 | 154             | 104         | 145         |
| Gorkiy Belok          | 1501        | 1574        | 1537        | 0.95 | 1639         | 1636        | 1637        | 1.00 | 138             | 62          | 100         |
| Baschelakskiy         | 1799        | 1760        | 1778        | 1.02 | 1879         | 1823        | 1853        | 1.03 | 80              | 63          | 76          |
| Cherginsky            | 1739        | 1709        | 1749        | 1.02 | 1781         | 1774        | 1801        | 1.00 | 41              | 65          | 52          |
| Ioldo                 | 1628        | 1668        | 1658        | 0.98 | 1732         | 1770        | 1756        | 0.98 | 104             | 103         | 98          |
| Elovyi                | 1667        | 1597        | 1626        | 1.04 | 1727         | 1671        | 1688        | 1.03 | 59              | 74          | 62          |
| Sinyuha               | 1369        | 1322        | 1355        | 1.04 | 1475         | 1490        | 1505        | 0.99 | 106             | 169         | 150         |
| Koksyisky             | 1458        | 1624        | 1552        | 0.90 | 1661         | 1733        | 1711        | 0.96 | 203             | 109         | 159         |
| Sarkyik               | 1871        | 1834        | 1834        | 1.02 | 1929         | 1902        | 1898        | 1.01 | 59              | 68          | 64          |
| Serginsky Belok       | 1317        | 1422        | 1370        | 0.93 | 1429         | 1545        | 1501        | 0.92 | 113             | 122         | 131         |
| Turgusin              | 1330        | 1651        | 1523        | 0.81 | 1451         | 1744        | 1627        | 0.83 | 122             | 93          | 104         |
| Krasnaya              | 1771        | 1755        | 1763        | 1.01 | 1928         | 1838        | 1883        | 1.05 | 158             | 83          | 120         |
| Holodny Belok         | 1883        | 1987        | 1956        | 0.95 | 1990         | 2086        | 2042        | 0.95 | 108             | 99          | 86          |
| Kara-Tyurek           | 1856        | 2088        | 2045        | 0.89 | 1970         | 2177        | 2152        | 0.90 | 114             | 89          | 107         |
| Aktru                 | 2111        | 2227        | 2160        | 0.95 | 2194         | 2301        | 2236        | 0.95 | 83              | 74          | 76          |
| Tetykol               | 2096        | 2065        | 2083        | 1.02 | 2155         | 2129        | 2144        | 1.01 | 59              | 65          | 61          |
| Bay-Tayga             | 1950        | 2032        | 2011        | 0.96 | 2002         | 2159        | 2103        | 0.93 | 52              | 127         | 91          |
| Tesninskiy Belok      | 1344        | 1702        | 1503        | 0.79 | 1552         | 1868        | 1691        | 0.83 | 208             | 166         | 188         |
| Listvyaga             | 1484        | 1796        | 1653        | 0.83 | 1631         | 1894        | 1759        | 0.86 | 147             | 98          | 106         |
| Taymenie              | 1738        | 1984        | 1823        | 0.88 | 1807         | 2041        | 1881        | 0.89 | 69              | 57          | 58          |
| Katunsky              | 2089        | 1958        | 2026        | 1.07 | 2205         | 2092        | 2145        | 1.05 | 116             | 134         | 118         |
| Altay_Tengzyak        | 1949        | 1902        | 1917        | 1.02 | 2021         | 1999        | 2004        | 1.01 | 71              | 97          | 88          |
| Altay_Tirektinskiy    | 1883        | 1903        | 1902        | 0.99 | 1984         | 2009        | 1998        | 0.99 | 100             | 105         | 95          |
| Altay_Tongosh         | 1990        | 2007        | 1999        | 0.99 | 2051         | 2091        | 2070        | 0.98 | 61              | 84          | 71          |
| Sayani_Borus          | 1448        | 1330        | 1389        | 1.09 | 1520         | 1478        | 1510        | 1.03 | 72              | 148         | 120         |
| Sayani_Ergaki         | 1515        | 1380        | 1474        | 1.10 | 1587         | 1492        | 1555        | 1.06 | 72              | 112         | 82          |
| Sayani_Khansyn        | 1566        | 1570        | 1554        | 1.00 | 1648         | 1637        | 1640        | 1.01 | 81              | 66          | 86          |
| Sayani_Kohosh         | 1978        | 1921        | 1955        | 1.03 | 2058         | 1988        | 2030        | 1.04 | 79              | 67          | 75          |
| Sayani_Kurtushubinsky | 1735        | 1653        | 1715        | 1.05 | 1837         | 1768        | 1814        | 1.04 | 102             | 115         | 99          |
| Sayani_Sarlinskii     | 1771        | 1745        | 1758        | 1.01 | 1929         | 1903        | 1893        | 1.01 | 157             | 158         | 135         |
| <b>Mean value</b>     | <b>1702</b> | <b>1753</b> | <b>1732</b> |      | <b>1805</b>  | <b>1852</b> | <b>1833</b> |      | <b>103</b>      | <b>99</b>   | <b>100</b>  |
| <b>St. Dev</b>        | <b>253</b>  | <b>236</b>  | <b>237</b>  |      | <b>234.6</b> | <b>226</b>  | <b>222</b>  |      | <b>42</b>       | <b>31.6</b> | <b>32.2</b> |

**Table S2.** Altitudinal shifts for period of 1960–2020 for sites with and without soil constrains and average shift in ASR.

| Peak            | Sites without Soil Constrains |     |     | Sites with Soil Constrains  |     |     | Average Altitudinal Shift |    |     |
|-----------------|-------------------------------|-----|-----|-----------------------------|-----|-----|---------------------------|----|-----|
|                 | Altitudinal Shift 1960–2020   |     |     | Altitudinal Shift 1960–2020 |     |     | Values                    |    |     |
|                 | S                             | N   | Gen | S                           | N   | Gen | S                         | N  | Gen |
| Tigereksky      | 154                           | 104 | 145 | 25                          | 2   | 13  | 90                        | 53 | 79  |
| Gorkiy Belok    | 138                           | 62  | 100 | 20                          | 43  | 31  | 79                        | 52 | 66  |
| Baschelakskiy   | 80                            | 63  | 76  | 36                          | 31  | 33  | 58                        | 47 | 55  |
| Cherginsky      | 41                            | 65  | 52  | 7                           | 20  | 13  | 24                        | 42 | 33  |
| Ioldo           | 104                           | 103 | 98  | 46                          | –48 | –1  | 75                        | 27 | 48  |
| Elovyi          | 59                            | 74  | 62  | 28                          | –3  | 13  | 43                        | 36 | 37  |
| Sinyuha         | 106                           | 169 | 150 | 27                          | 3   | 15  | 66                        | 86 | 82  |
| Koksyisky       | 203                           | 109 | 159 | –24                         | 27  | 2   | 89                        | 68 | 80  |
| Sarkyik         | 59                            | 68  | 64  | 0                           | 16  | 8   | 29                        | 42 | 36  |
| Serginsky Belok | 113                           | 122 | 131 | –18                         | 22  | 2   | 47                        | 72 | 66  |
| Turgusin        | 122                           | 93  | 104 | 13                          | 8   | 11  | 67                        | 51 | 57  |
| Krasnaya        | 158                           | 83  | 120 | –1                          | 2   | 0   | 78                        | 42 | 60  |
| Holodny Belok   | 108                           | 99  | 86  | 57                          | 21  | 39  | 82                        | 60 | 62  |

|                       |      |      |      |      |      |      |      |      |      |
|-----------------------|------|------|------|------|------|------|------|------|------|
| Kara-Tyurek           | 114  | 89   | 107  |      | 67   |      | 114  | 78   | 107  |
| Aktru                 | 83   | 74   | 76   | 16   | -5   | 6    | 50   | 35   | 41   |
| Tetykol               | 59   | 65   | 61   | 10   | -2   | 4    | 35   | 32   | 33   |
| Bay-Tayga             | 52   | 127  | 91   | 33   | 35   | 34   | 43   | 81   | 63   |
| Tesninskiy Belok      | 208  | 166  | 188  | -6   | -28  | -17  | 101  | 69   | 85   |
| Listvyaga             | 147  | 98   | 106  |      | 115  |      | 147  | 106  | 106  |
| Taymenie              | 69   | 57   | 58   | 9    | 4    | 6    | 39   | 30   | 32   |
| Katunsky              | 116  | 134  | 118  | 72   | 66   | 69   | 94   | 100  | 93   |
| Altay_Tengzyak        | 71   | 97   | 88   | 65   | 53   | 59   | 68   | 75   | 73   |
| Altay_Tirektinskiy    | 100  | 105  | 95   | 2    | 17   | 9    | 51   | 61   | 52   |
| Altay_Tongosh         | 61   | 84   | 71   | 33   | 14   | 23   | 47   | 49   | 47   |
| Sayani_Borus          | 72   | 148  | 120  | 40   | 18   | 29   | 56   | 83   | 74   |
| Sayani_Ergaki         | 72   | 112  | 82   | 22   | 32   | 27   | 47   | 72   | 54   |
| Sayani_Khansyn        | 81   | 66   | 86   | 1    | 21   | 11   | 41   | 43   | 49   |
| Sayani_Kohosh         | 79   | 67   | 75   | 41   | 47   | 44   | 60   | 57   | 59   |
| Sayani_Kurtushubinsky | 102  | 115  | 99   | 28   | 12   | 20   | 65   | 63   | 59   |
| Sayani_Sarlinskii     | 157  | 158  | 135  | 77   | 104  | 90   | 117  | 131  | 113  |
| Mean value            | 103  | 99   | 100  | 23   | 24   | 21   | 67   | 61   | 63   |
| St. Dev               | 42.2 | 31.6 | 32.2 | 24.4 | 32.6 | 22.4 | 27.5 | 23.5 | 21.7 |

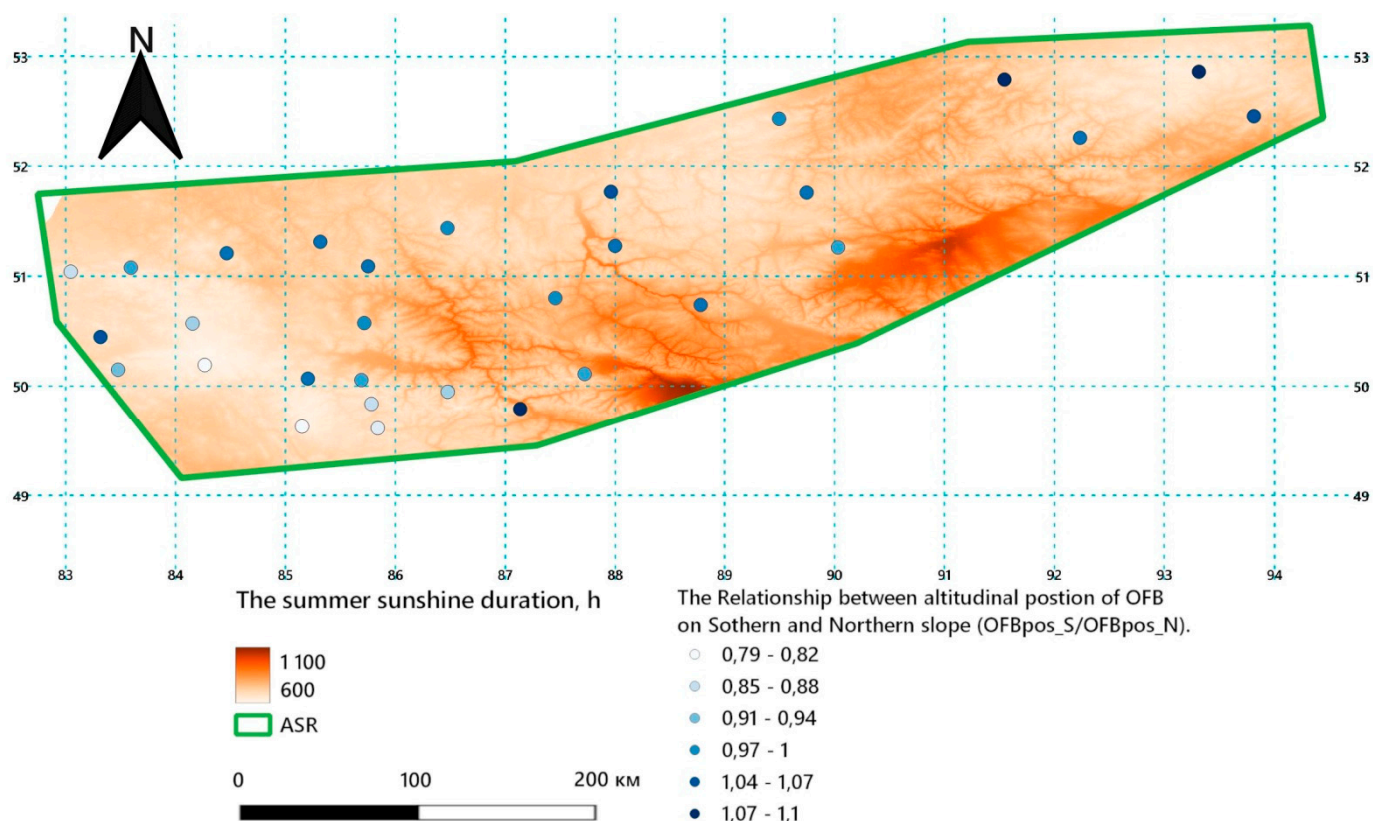

**Figure S1.** The values of OFBpos\_S/OFBpos\_N for 30 summits, the summer sunshine duration and the geographic positions.
